# Supplementary material
Source: publisher site journal article supplement (https://www.dovepress.com/article/159936)
Supplement: Supplementary file 1 [file get_supplementary_file.php]

## Supplementary Figure 1

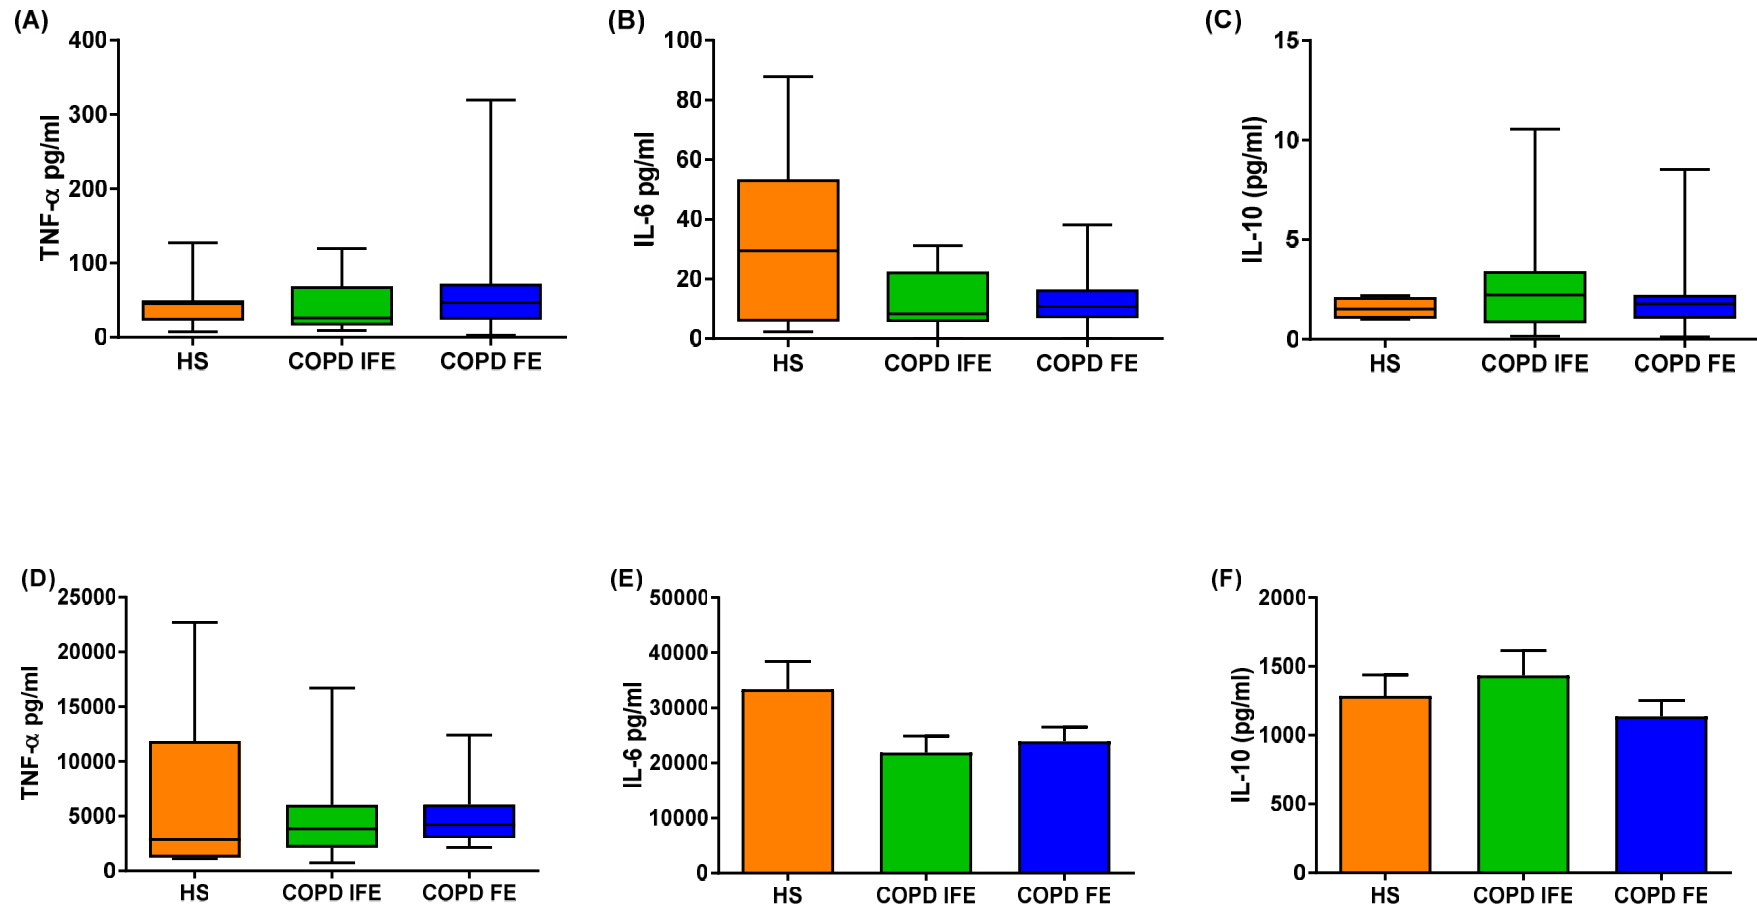

Supplementary figure 1. Baseline and LPS-stimulated cytokine release from peripheral blood mononuclear cells. The levels of TNF- $\alpha$  (A and D), IL-6 (B and E) and IL-10 (C and F) were analysed in the supernatants of untreated (A – C) or LPS stimulated (D – F) PBMCs from healthy smokers (HS; orange), COPD infrequent exacerbators (COPD IFE; green) and COPD frequent exacerbators (COPD FE; blue). Data shown are mean  $\pm$  SEM (E and F) and median with range (A – D).

## Supplementary Figure 2

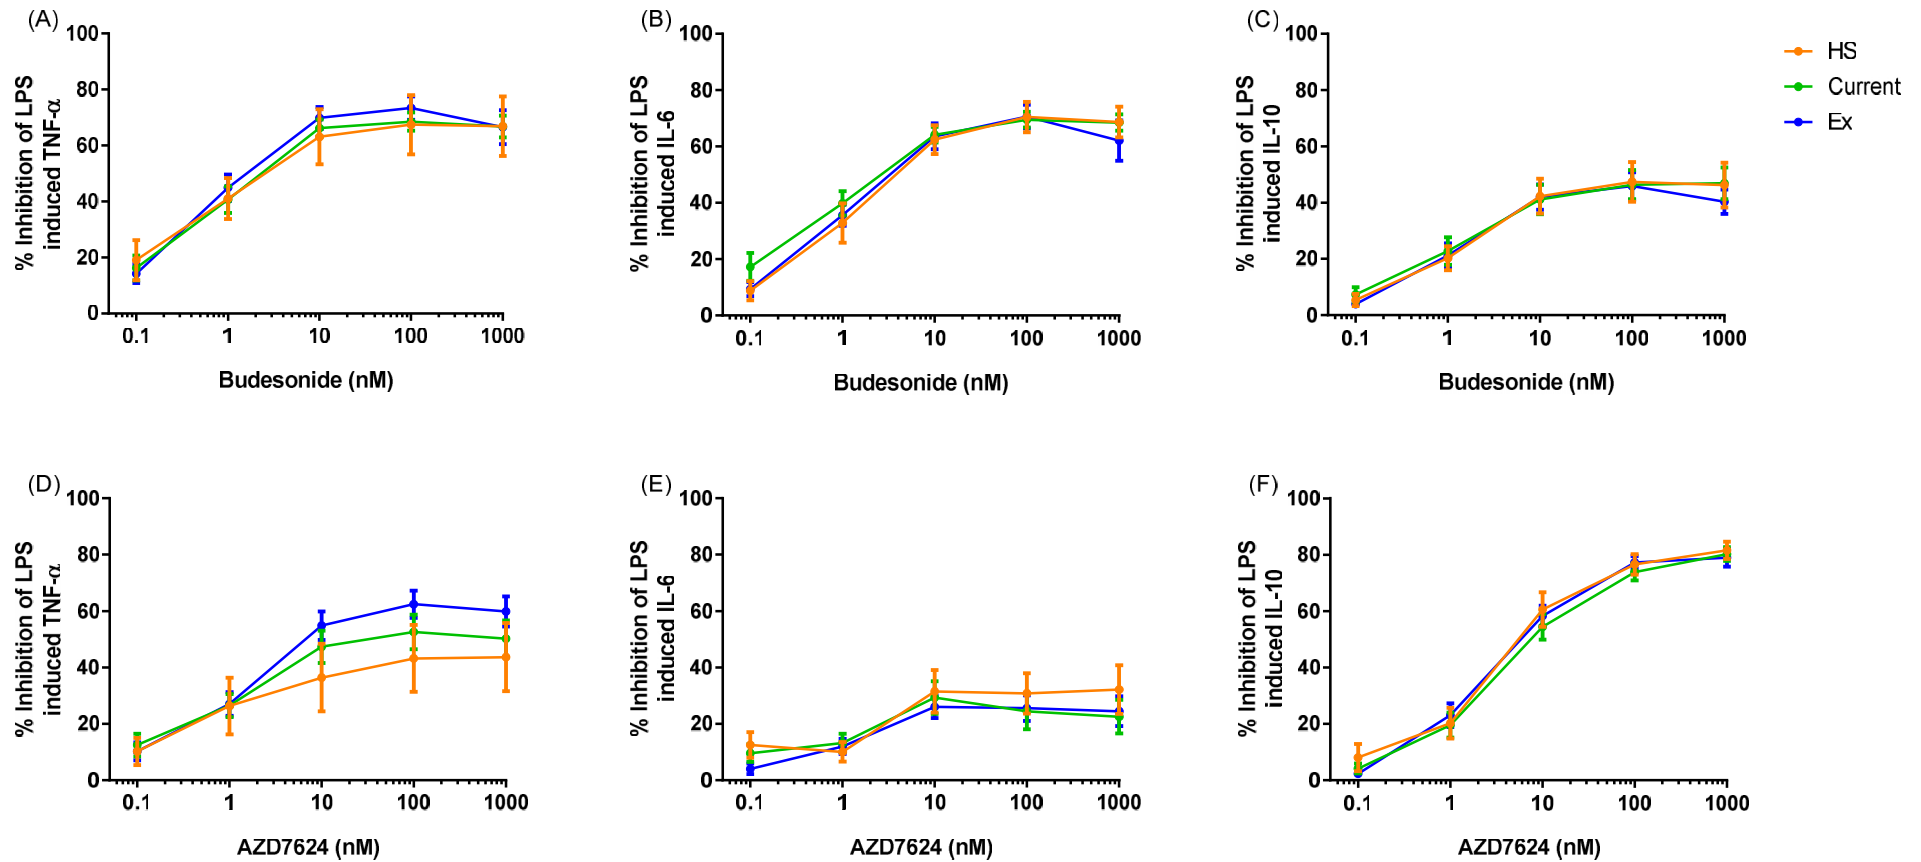

Supplementary figure 2. Group mean budesonide and AZD7624 concentration curves in peripheral blood mononuclear cells, according to smoking status. The group mean data for inhibition of TNF- $\alpha$  (A and D), IL-6 (B and E) and IL-10 (C and F) by budesonide (A – C) and AZD7624 (D – F) are shown for healthy smokers (HS; orange plot), COPD current smokers (green plot) and COPD ex-smokers (blue plot). Data shown are mean  $\pm$  SEM.

## Supplementary Figure 3

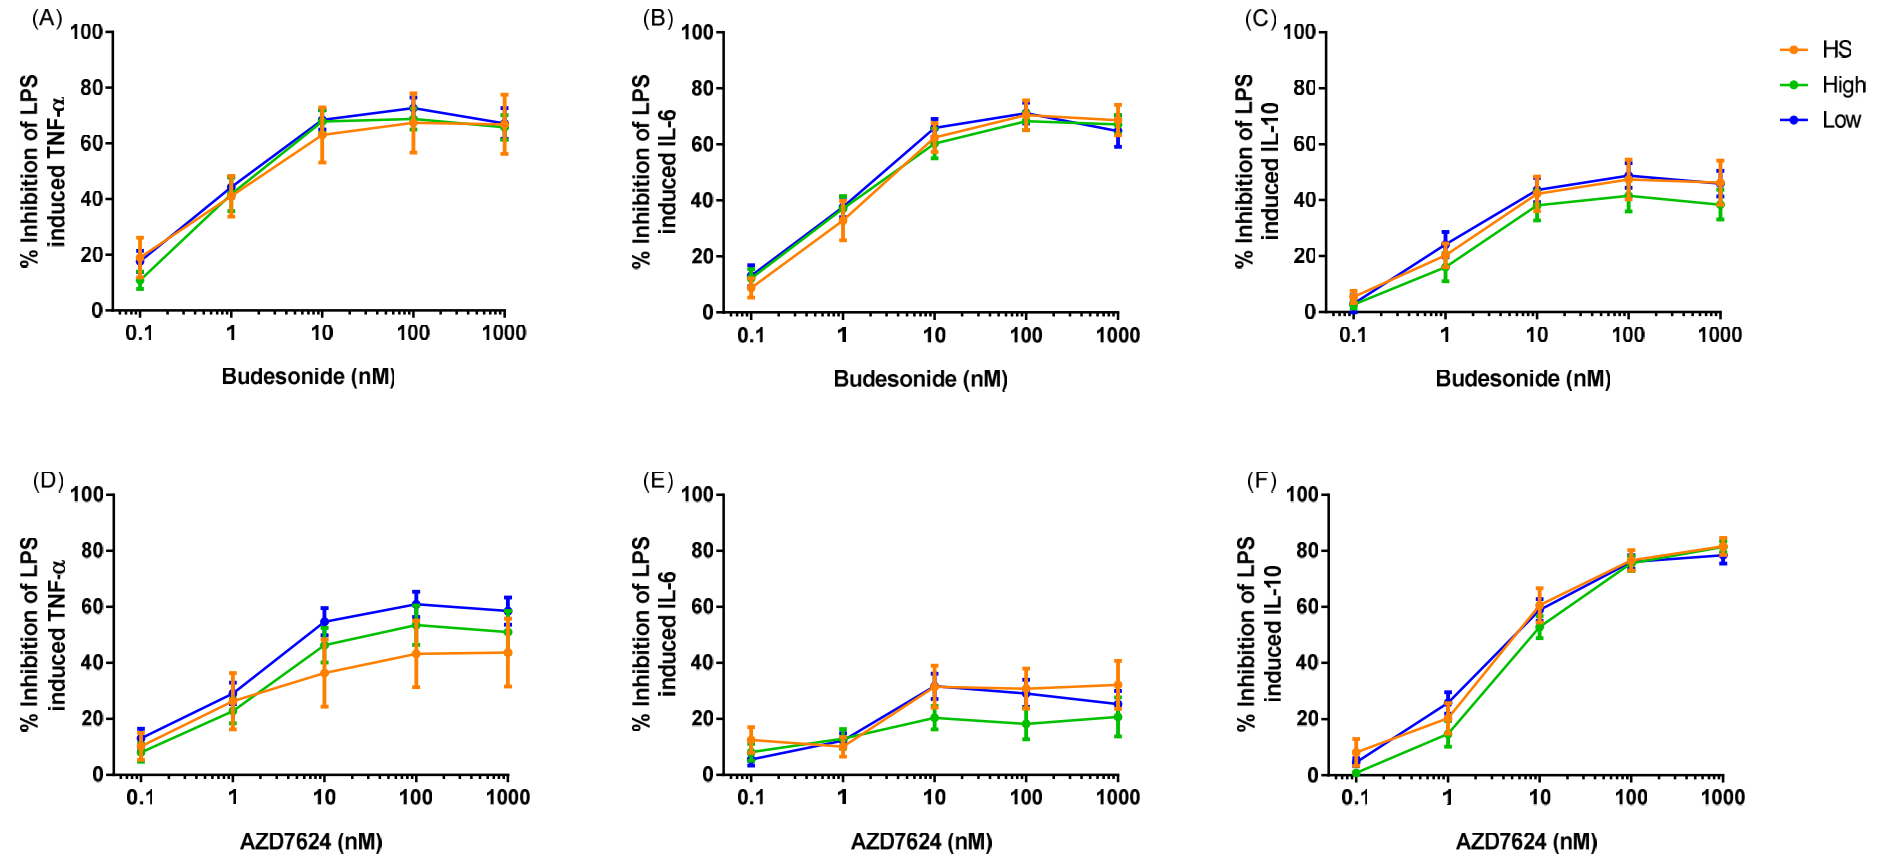

Supplementary figure 3. Group mean budesonide and AZD7624 concentration curves in peripheral blood mononuclear cells, according to blood eosinophil count. The group mean data for inhibition of TNF- $\alpha$  (A and D), IL-6 (B and E) and IL-10 (C and F) by budesonide (A – C) and AZD7624 (D – F) are shown for healthy smokers (HS; orange plot), COPD high blood eosinophils (green plot) and COPD low blood eosinophils (blue plot). An eosinophil threshold of 300 cells/ $\mu$ l was applied for purposes of high/low analysis. Data shown are mean  $\pm$  SEM.

## Supplementary Figure 4

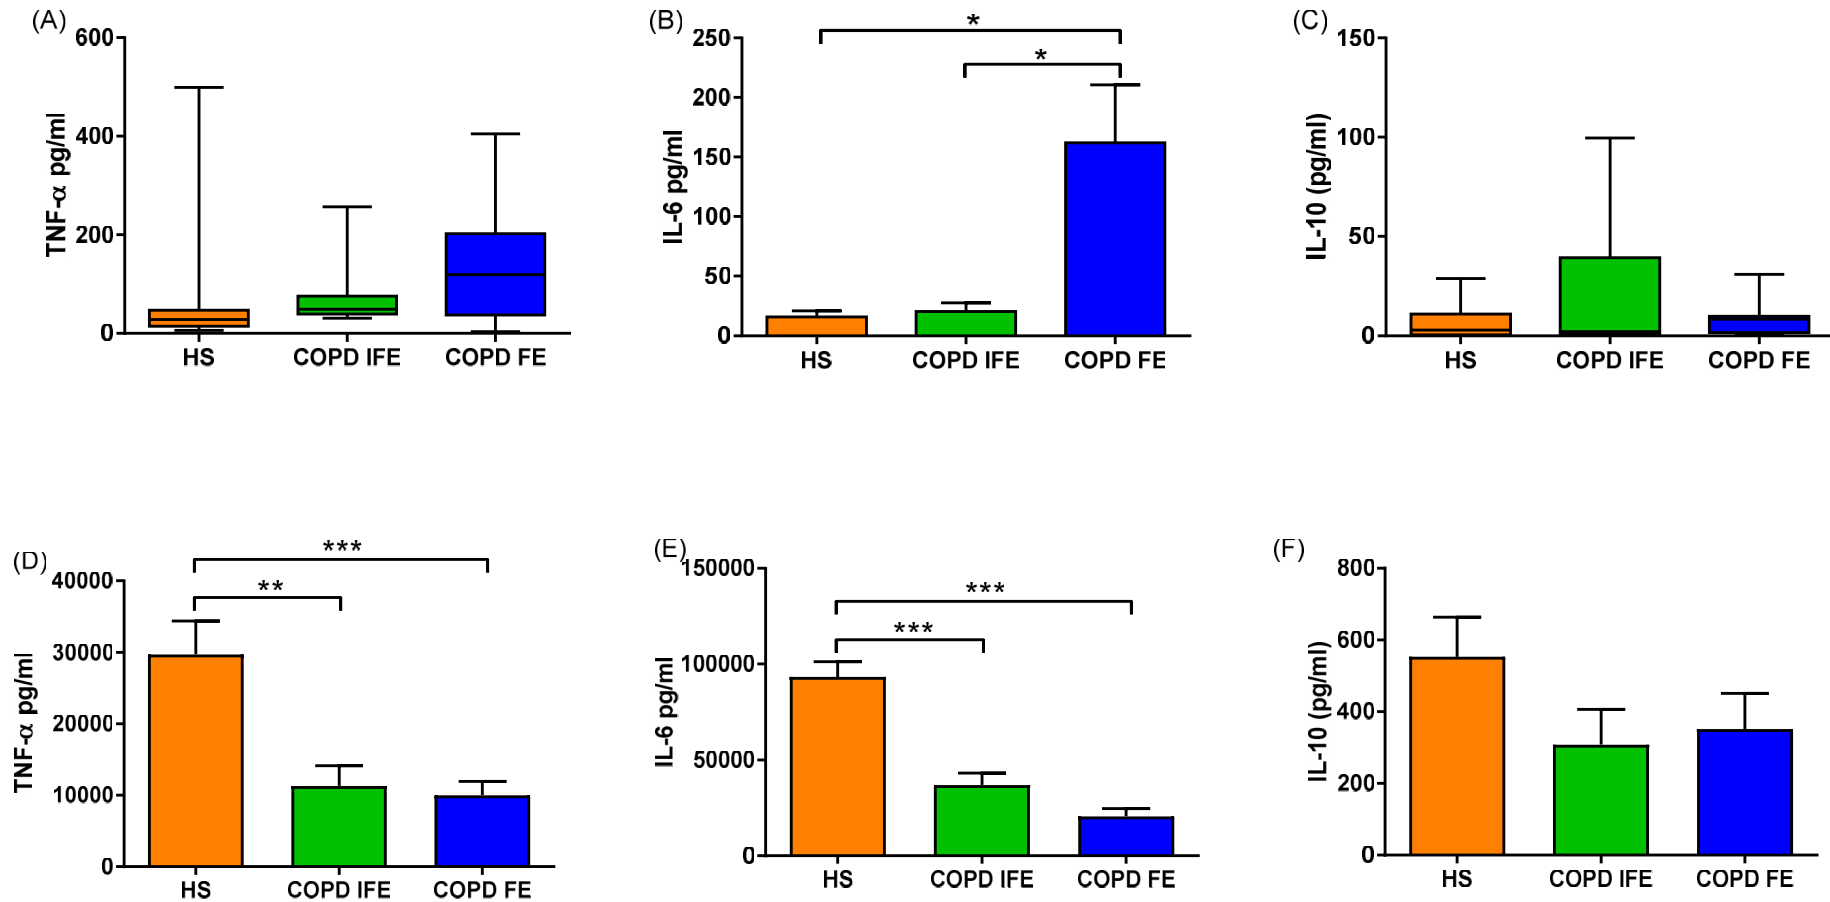

Supplementary figure 4. Baseline and LPS-stimulated cytokine release from alveolar macrophages. The levels of TNF- $\alpha$  (A and D), IL-6 (B and E) and IL-10 (C and F) were analysed in the supernatants of untreated (A – C) or LPS stimulated (D – F) alveolar macrophages from healthy smokers (HS; orange), COPD infrequent exacerbators (COPD IFE; green) and COPD frequent exacerbators (COPD FE; blue). Data shown are mean  $\pm$  SEM (B, D – F) and median with range (A and C). \*, \*\*, \*\*\* = significant difference where  $p < 0.05$ ,  $p < 0.01$  and  $p < 0.001$  respectively.

## Supplementary Figure 5

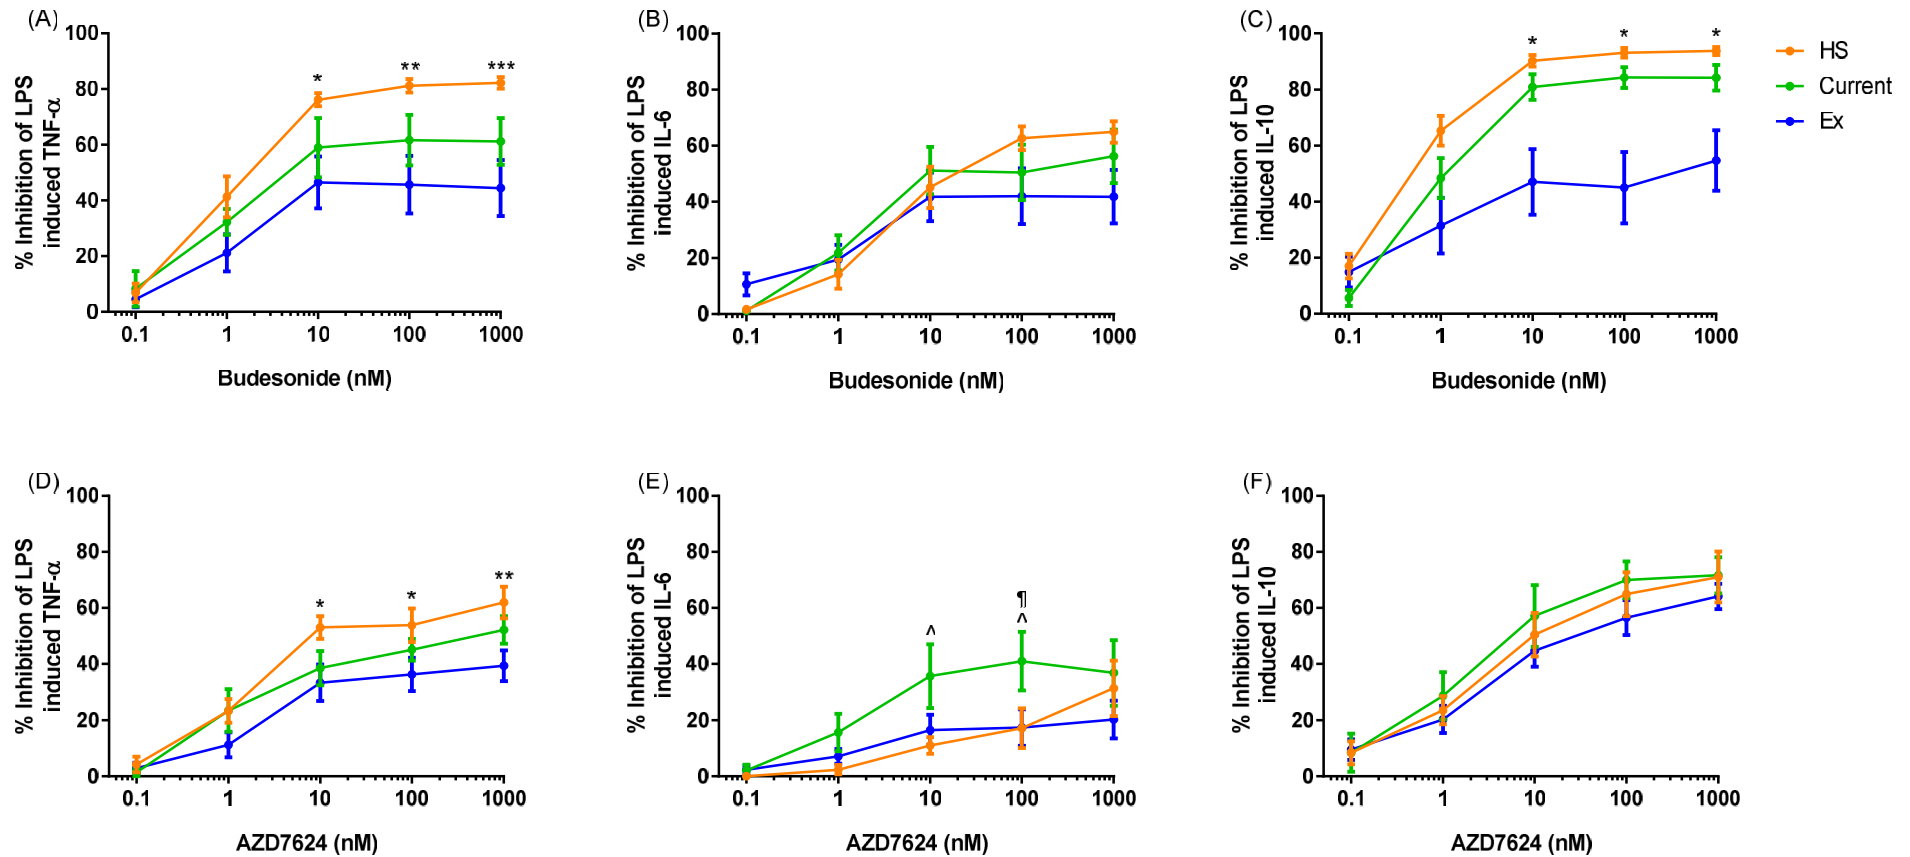

Supplementary figure 5. Group mean budesonide and AZD7624 concentration curves in alveolar macrophages, according to smoking status. The group mean data for inhibition of TNF- $\alpha$  (A and D), IL-6 (B and E) and IL-10 (C and F) by budesonide (A – C) and AZD7624 (D – F) are shown for healthy smokers (HS; orange plot), COPD current smokers (green plot) and COPD ex-smokers (blue plot). Data shown are mean  $\pm$  SEM. \*, \*\*, \*\*\* = significant difference between HS and COPD ex-smokers where  $p < 0.05$ ,  $p < 0.01$  and  $p < 0.001$  respectively. ^ = significant difference between HS and COPD current smokers where  $p < 0.05$ . ¶ = significant difference between COPD current smokers and COPD ex-smokers where  $p < 0.05$ .

## Supplementary Figure 6

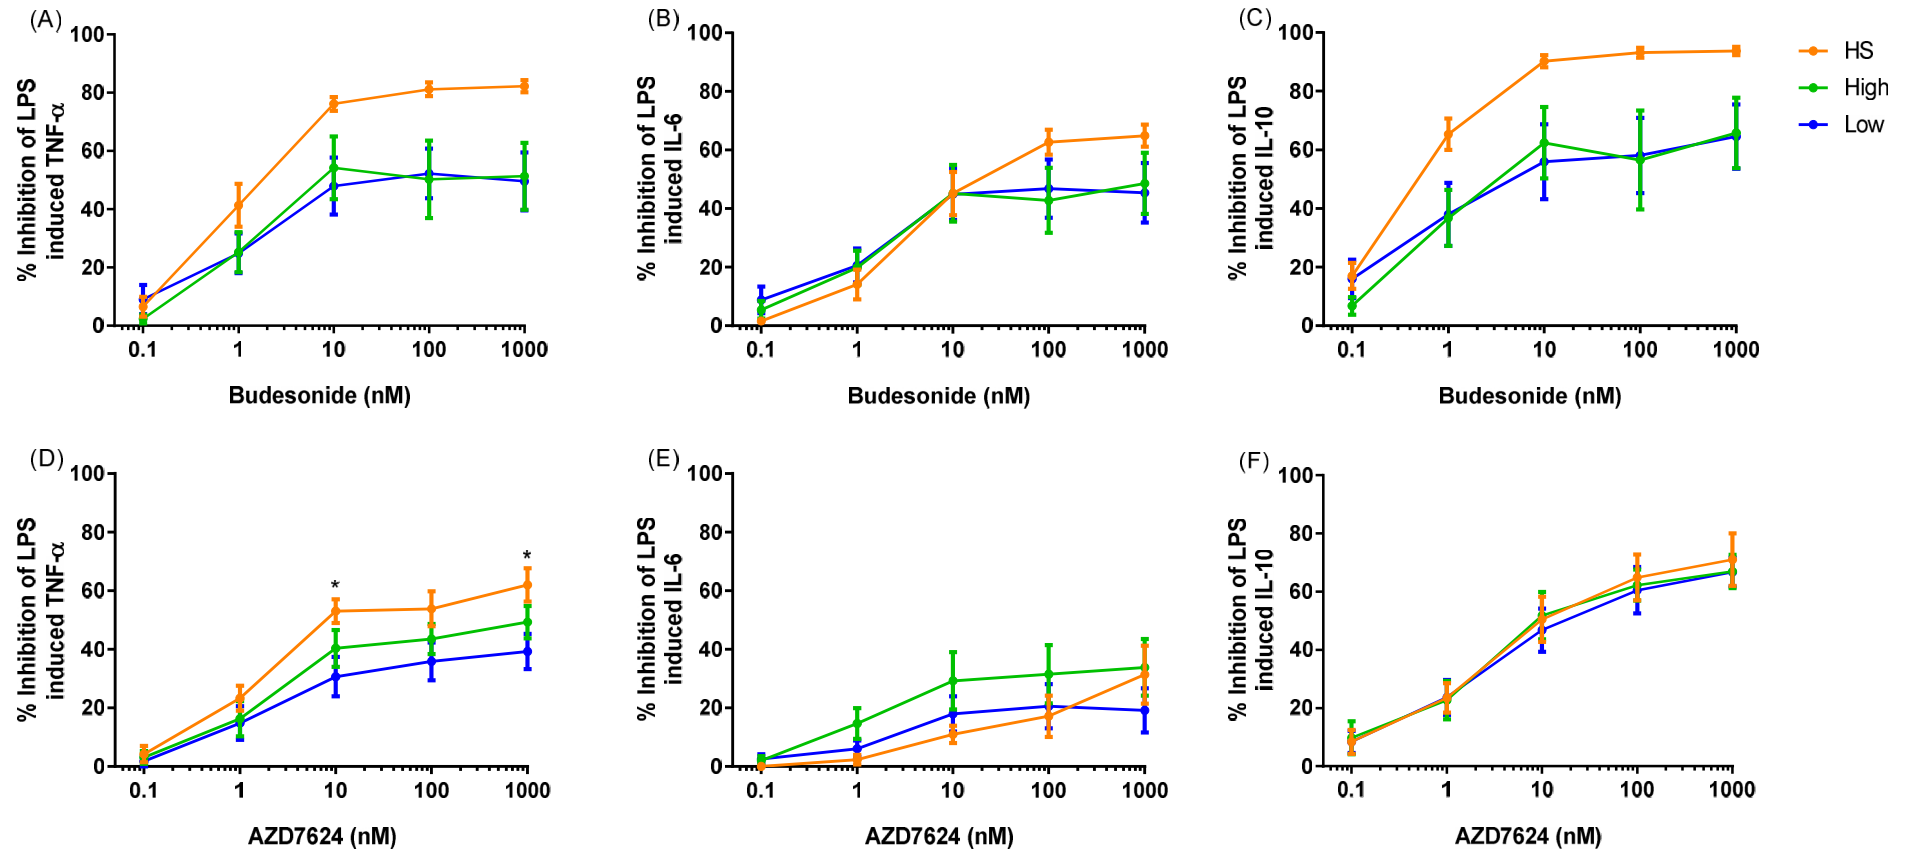

Supplementary figure 6. Group mean budesonide and AZD7624 concentration curves in alveolar macrophages, according to blood eosinophil count. The group mean data for inhibition of TNF- $\alpha$  (A and D), IL-6 (B and E) and IL-10 (C and F) by budesonide (A – C) and AZD7624 (D – F) are shown for healthy smokers (HS; orange plot), COPD high blood eosinophils (green plot) and COPD low blood eosinophils (blue plot). An eosinophil threshold of 300 cells/ $\mu$ l was applied for purposes of high/low analysis. Data shown are mean  $\pm$  SEM. \*, = significant difference between HS and COPD ex-smokers where  $p < 0.05$ .

## Supplementary Figure 7

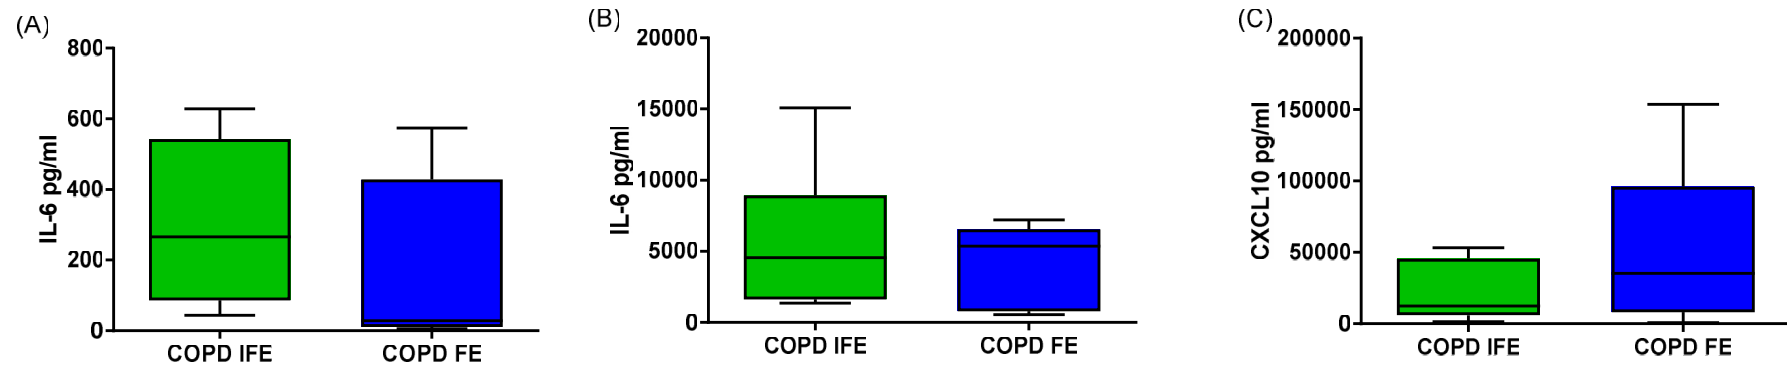

Supplementary figure 7. Baseline and poly I:C stimulated cytokine release from bronchial epithelial cells. The levels of IL-6 (A – B) and CXCL10 (C) were analysed in the supernatants of untreated (A) and poly I:C stimulated (B and C) BECs from COPD infrequent exacerbators (COPD IFE; green) and COPD frequent exacerbators (blue). Data shown are median with range.

**Supplementary table 1. Sputum and BAL and blood characteristics of the study population.**

|                                                             | Healthy Smokers | COPD Patients           |                       |
|-------------------------------------------------------------|-----------------|-------------------------|-----------------------|
|                                                             |                 | Infrequent Exacerbators | Frequent Exacerbators |
| Sputum                                                      |                 |                         |                       |
| Absolute neutrophil count (x10 <sup>6</sup> /g sputum)      | 10.4            | 14.7                    | 15.6                  |
| Absolute macrophage count (x10 <sup>6</sup> /g sputum)      | 2.3             | 2.1                     | 3.0                   |
| Absolute eosinophil count (x10 <sup>6</sup> /g sputum)      | 0.03            | 0.2                     | 0.6                   |
| Absolute lymphocytes count (x10 <sup>6</sup> /g sputum)     | 0.03            | 0.01                    | 0.05                  |
| Absolute epithelial cell count (x10 <sup>6</sup> /g sputum) | 0.07            | 0.2                     | 0.3                   |
| Neutrophil (%)                                              | 69.8            | 70.9                    | 74.2                  |
| Macrophage (%)                                              | 27.7            | 17.1                    | 19.7                  |
| Eosinophil (%)                                              | 0.7             | 2.5                     | 2.4                   |
| Lymphocyte (%)                                              | 0.8             | 0.06**                  | 0.3                   |
| Epithelial cell (%)                                         | 1.0             | 1.9                     | 3.4                   |
| BAL                                                         |                 |                         |                       |
| Neutrophil (%)                                              | 0.5             | 4.8                     | 13                    |
| Macrophage (%)                                              | 96              | 87                      | 80                    |
| Eosinophil (%)                                              | 0.1             | 0.5                     | 0.4                   |
| Lymphocyte (%)                                              | 1.8             | 3.2                     | 2.2                   |
| Epithelial cell (%)                                         | 1.4             | 4.5                     | 4.4                   |
| Blood                                                       |                 |                         |                       |
| WBC x 10 <sup>9</sup> /l                                    | 7.3             | 7.3                     | 6.5                   |
| Neutrophils x 10 <sup>9</sup> /l                            | 3.8             | 4.1                     | 3.6                   |
| Lymphocytes x 10 <sup>9</sup> /l                            | 2.6             | 2.2                     | 2.0                   |
| Monocytes x 10 <sup>9</sup> /l                              | 0.7             | 0.7                     | 0.6                   |
| Eosinophils x 10 <sup>9</sup> /l                            | 0.23            | 0.3                     | 0.26                  |
| Basophils x 10 <sup>9</sup> /l                              | 0.04            | 0.06                    | 0.05                  |

Data presented as mean where \* = significant difference compared to healthy smokers.



**Supplementary table 2. Maximal inhibitions of budesonide and AZD7624 on LPS-induced cytokine release from peripheral blood mononuclear cells.**

| Subject Group | Maximum Inhibition |         |            |         |            |         |
|---------------|--------------------|---------|------------|---------|------------|---------|
|               | TNF- $\alpha$      |         | IL-6       |         | IL-10      |         |
|               | Budesonide         | AZD7624 | Budesonide | AZD7624 | Budesonide | AZD7624 |
| HS            | 67**               | 44      | 68***      | 32      | 46         | 82 †††  |
| COPD IFE      | 70**               | 57      | 64***      | 23      | 42         | 84 †††  |
| COPD FE       | 68***              | 60      | 72***      | 32      | 44         | 76 †††  |

Data presented as means. \*, \*\*, \*\*\* = significantly above AZD7624 (two-way ANOVA followed by Tukey's post-hoc test where  $p < 0.05$ , 0.01 and 0.001 respectively). †, ††, ††† = significantly above budesonide (two-way ANOVA followed by Tukey's post-hoc test where  $p < 0.05$ , 0.01 and 0.001 respectively).

FE: frequent exacerbators; HS: healthy smokers; IFE: infrequent exacerbators.

**Supplementary table 3. Maximal inhibitions of budesonide and AZD7624 on LPS-induced cytokine release from alveolar macrophages.**

| Subject Group | Maximum Inhibition |         |            |         |            |         |
|---------------|--------------------|---------|------------|---------|------------|---------|
|               | TNF- $\alpha$      |         | IL-6       |         | IL-10      |         |
|               | Budesonide         | AZD7624 | Budesonide | AZD7624 | Budesonide | AZD7624 |
| HS            | 80***              | 59      | 65***      | 31      | 94***      | 71      |
| COPD IFE      | 56                 | 50      | 51         | 42      | 64         | 69      |
| COPD FE       | 45                 | 39      | 43***      | 11      | 66         | 65      |

Data presented as means. \*, \*\*, \*\*\* = significantly above AZD7624 (two-way ANOVA followed by Tukey's post-hoc test where  $p < 0.05$ , 0.01 and 0.001 respectively). †, ††, ††† = significantly above budesonide (two-way ANOVA followed by Tukey's post-hoc test where  $p < 0.05$ , 0.01 and 0.001 respectively).

FE: frequent exacerbators; HS: healthy smokers; IFE: infrequent exacerbators.

**Supplementary table 4. Maximal inhibitions of budesonide and AZD7624 on poly I:C induced cytokine release from bronchial epithelial cells.**

| Subject Group | Maximum Inhibition |         |            |         |
|---------------|--------------------|---------|------------|---------|
|               | IL-6               |         | IP-10      |         |
|               | Budesonide         | AZD7624 | Budesonide | AZD7624 |
| COPD IFE      | 23                 | 49 ‡‡‡  | 20         | 39      |
| COPD FE       | 14                 | 64 ‡‡‡  | 4          | 19      |

Data presented as means. \*, \*\*, \*\*\* = significantly above AZD7624 (two-way ANOVA followed by Tukey's post-hoc test where  $p < 0.05$ , 0.01 and 0.001 respectively). ‡, ‡‡, ‡‡‡ = significantly above budesonide (two-way ANOVA followed by Tukey's post-hoc test where  $p < 0.05$ , 0.01 and 0.001 respectively).

FE: frequent exacerbators; IFE: infrequent exacerbators
